# Supplementary material
Source: PubMed Central journal article supplement (PMC5772774)
Supplement: NIHMS891666-supplement.pdf [file NIHMS891666-supplement.pdf]

## Supplemental information

### **The lysine acetyltransferase GCN5 is required for iNKT cell development through catalyzing EGR2 acetylation**

Yajun Wang<sup>1,3,10</sup>, Chawon Yun<sup>1,10</sup>, Beixue Gao<sup>1,10</sup>, Yuanming<sup>1</sup> Xu, Yana Zhang<sup>1,2,6</sup>, Yiming Wang<sup>4</sup>,  
Qingfei Kong<sup>1</sup>, Fang Zhao<sup>1</sup>, Chyung-Ru Wang<sup>7</sup>, Sharon Y.R. Dent<sup>8</sup>, Jian Wang<sup>9</sup>, Xiangping Xu<sup>3,\*</sup>,  
Hua-Bin Li<sup>2,\*</sup> and Deyu Fang<sup>1,4,5,\*</sup>

**Figure S1. Analysis of iNKT cell development using the tetramer loading control—related to Figure 2.**

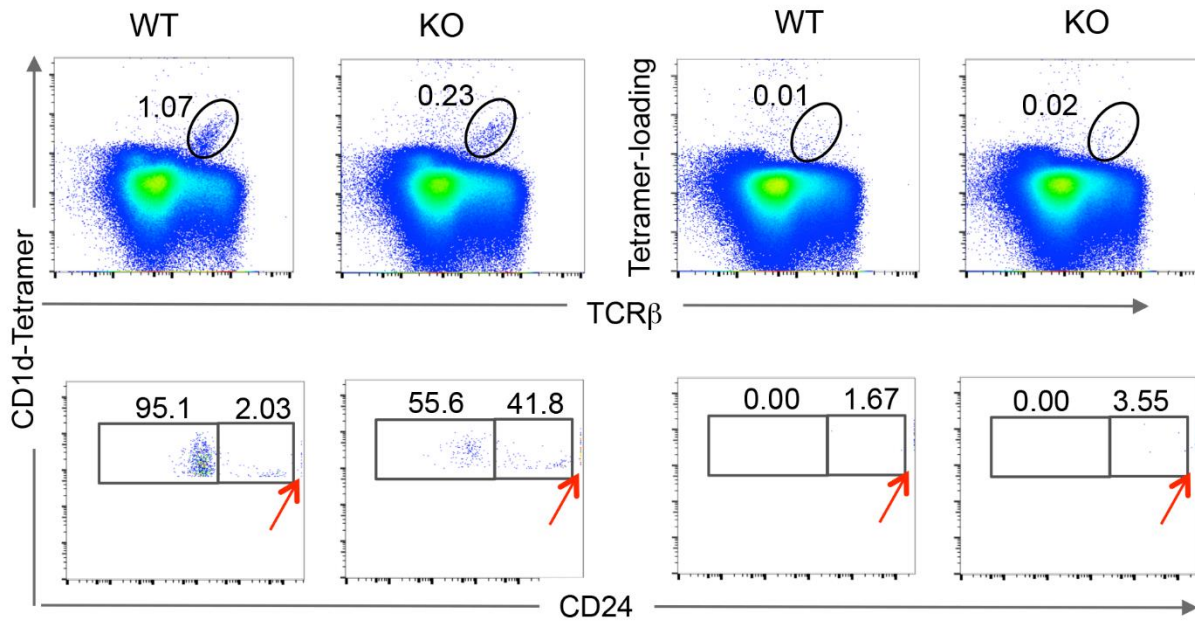

Single-cell suspensions from the thymus of WT and GCN5 KO mice were isolated. iNKT cells were identified with CD1d-tetramer and TCR $\beta$  staining using the tetramer loading control (top panels). The iNKT development in the thymus of WT and GCN5 KO mice was further analyzed by their expression of CD24 (bottom panels).

**Table s1. Antibodies used for the flow cytometry analysis—related to Figures 1-3 & 7.**

| Fluorescence    | Antigen       | Company     | Cat. #        |
|-----------------|---------------|-------------|---------------|
| Alexa 647       | Annxin V      | Biolegend   | 640912        |
| FITC            | Annxin V      | Biolegend   | 640906        |
| PerCP/Cy5.5     | CD4 (GK1.5)   | Biolegend   | 100433        |
| APC             | CD4 (RM4-5)   | eBioscience | 17-0042-82    |
| PerCPCy5.5      | CD8 (53-6.7)  | Biolegend   | 100733        |
| PE              | CD8 (53-6.7)  | eBioscience | 12-0081-83    |
| PerCP/Cy5.5     | CD24 (M1/69)  | Biolegend   | 101823        |
| APC             | CD24 (M1/69)  | Biolegend   | 101814        |
| PE Cy7          | CD44 (IM7)    | Biolegend   | 103030        |
| FITC            | CD44 (IM7)    | eBioscience | 11-0441-81    |
| FITC            | CD122 (TM-b1) | Biolegend   | 123208        |
| PE              | CD122 (5H4)   | Biolegend   | 105905        |
| PE              | NK1.1 (PK136) | Biolegend   | 123505        |
| FITC            | CD1d          | Biolegend   | <b>108709</b> |
| Pacific Blue    | T-Bet (4B10)  | Biolegend   | 644807        |
| PE              | PLZF (9E12)   | Biolegend   | 145803        |
| PerCP/Cy5.5     | PLZF (9E12)   | Biolegend   | 145803        |
| PE              | Runx1         | eBioscience | 12-9816-80    |
| PE              | Egr2          | eBioscience | 12-6691-80    |
| unconjugated    | Ac-H3         | Millipore   | 06-599        |
| Alexa Fluor 488 | Rabbit IgG    | BD          | 544020        |
| Pacific Blue    | CD45.1 (A20)  | Biolegend   | 110722        |
| PE/CY7          | Cd45.2 (104)  | Biolegend   | 109829        |

\* All antibodies were used at concentrations as recommended by the manufactures.

**Table S2: Primers used for the study—related to Figures 3 & 5-7.**

| <b>Primer name</b> | <b>Sequence (5' to 3')</b>    | <b>Use</b>       |
|--------------------|-------------------------------|------------------|
| Gcn5-F             | TTG ATT GAG CGC AAA CAG GC    | Real-time RT-PCR |
| Gcn5-R             | CAG CCT GTC TCT CGA ATG CC    | Real-time RT-PCR |
| PCAF-F             | GTT CTT GGT GTT GGT CGT GA    | Real-time RT-PCR |
| PCAF-R             | ATG GCT ACA GCT TCG ACA GG    | Real-time RT-PCR |
| Egr2-F             | CTA CCC GGT GGA AGA CCT C     | Real-time RT-PCR |
| Egr2-R             | AAT GTT GAT CAT GCC ATC TCC   | Real-time RT-PCR |
| Runx1-F            | CTC CGT GCT ACC CAC TAC CT    | Real-time RT-PCR |
| Runx1-R            | ATG ACG GTG ACC AGA GTG C     | Real-time RT-PCR |
| BclXI-F            | CCT TGG ATC CAG GAG AAC G     | Real-time RT-PCR |
| BclXI-R            | CAG GAA CCA GCG GTT GAA       | Real-time RT-PCR |
| VDR-F              | TGG ACA TTG GCA TGA TGA A     | Real-time RT-PCR |
| VDR-R              | GGC CTC AGA CTG TCC TTC AA    | Real-time RT-PCR |
| c-Myc-F            | CCT AGT GCT GCA TGA GGA GA    | Real-time RT-PCR |
| c-Myc-R            | TCC ACA GAC ACC ACA TCA ATT T | Real-time RT-PCR |
| PLZF-F             | GAC GCA CTA CAG GGT TCA CA    | Real-time RT-PCR |
| PLZF-R             | GCT TGA TCA TGG CCG AGT AG    | Real-time RT-PCR |
| RelA-F             | CAT GCG ATT CCG CTA TAA AT    | Real-time RT-PCR |
| RelA-R             | GGT CCT GTG TAG CCA TTG ATC T | Real-time RT-PCR |
| GATA3-F            | GAC TCT TCC CAC CCA GCA       | Real-time RT-PCR |
| GATA3-R            | CCC CGC AGT TCA CAC ACT       | Real-time RT-PCR |
| Tbet-F             | GAA AGG CAG AAG GCA GCA T     | Real-time RT-PCR |
| Tbet-R             | GAG CTT TAG CTT CCC AAA TGA A | Real-time RT-PCR |
| Bcl2-F             | GTA CCT GAA CCG GCA TCT G     | Real-time RT-PCR |
| Bcl2-R             | GGG GCC ATA TAG TTC CAC AA    | Real-time RT-PCR |
| ITK-F              | GGA AAA AGC TTG TGT CAT CCA   | Real-time RT-PCR |
| ITK-R              | CCA AAG TCG GAC ACC TTG AT    | Real-time RT-PCR |
| RelB-F             | GTG ACC TCT CTT CCC TGT CAC T | Real-time RT-PCR |
| RelB-R             | TGT ATT CGT CGA TGA TTT CCA A | Real-time RT-PCR |
| cMyb-F             | GCC TTC CCT GTT GGT TTG       | Real-time RT-PCR |

|                  |                                   |                             |
|------------------|-----------------------------------|-----------------------------|
| cMyb-R           | CAT TCA TCC TTC TCC CGA GT        | Real-time RT-PCR            |
| P300-F           | AAC AAA GCC AGC CAT CTG GA        | Real-time RT-PCR            |
| P300-R           | GAG GCC ACA CCA GCA TTT TC        | Real-time RT-PCR            |
| Tip60-F          | GGA GGT GGG GGA GAT AAT CG        | Real-time RT-PCR            |
| Tip60-R          | CTT TCG GCC ACT GAT GTC CT        | Real-time RT-PCR            |
| $\beta$ -Actin-F | CTA AGG CCA ACC GTG AAA AG        | Real-time RT-PCR            |
| $\beta$ -Actin-R | ACC AGA GGC ATA CAG GGA CA        | Real-time RT-PCR            |
|                  |                                   |                             |
| WL20-EJ          | CAC AGA GCT TCT TGG AGA CC        | Gcn5 floxed mice genotyping |
| WL21-3-EJ        | GGC TTG ATT CCT GTA CCT CC        | Gcn5 floxed mice genotyping |
| oIMR1084         | GCG GTC TGG CAG TAA AAA CTA TC    | LCK-Cre TG mice genotyping  |
| oIMR1085         | GTG AAA CAG CAT TGC TGT CAC TT    | LCK-Cre TG mice genotyping  |
| oIMR7338         | CTA GGC CAC AGA ATT GAA AGA TCT   | LCK-Cre TG mice genotyping  |
| oIMR7339         | GTA GGT GGA AAT TCT AGC ATC ATC C | LCK-Cre TG mice genotyping  |
|                  |                                   |                             |
| Tbet-p-1         | CAT ACT AGC TCC CGT ATT A         | ChIP                        |
| Tbet-p-2         | GTA AAG CGG ACT GCG AAG T         | ChIP                        |
| Runx1-p-1        | CGT CTC ATG AGG GGC CAG G         | ChIP                        |
| Runx1-p-2        | ATG CCA AGG CTC TGG GAT AG        | ChIP                        |
| PLZF-p-1         | CAG CAT ATT GCA AAT GGT           | ChIP                        |
| PLZF-p-2         | AGA TAT CAT CCA CAC TG            | ChIP                        |
| IL2RB-p-1        | CAA GGC GAG CCC ACT TCC T         | ChIP                        |
| IL2RB-p-2        | CTA GGT CCC TGT CCA ACA           | ChIP                        |
| Bclxl-p-1        | CAT AGG TTT TAA GCC AAG TA        | ChIP                        |
| Bclxl-p-2        | TTC TGT TAT ATG GCA TGG C         | ChIP                        |

**Table S3. Antibodies used for western blotting, ChIP and immunoprecipitation—related to Figures 5-7.**

| <b>Antigen</b> | <b>Species</b> | <b>Company</b> | <b>Cat #</b> |
|----------------|----------------|----------------|--------------|
| HA             | R              | Santa Cruz     | SC-805       |
| Egr-2          | R              | Santa Cruz     | SC-20690     |
| Tubulin        | M              | Calbiochem     | CP06         |
| GCN5L2         | R              | Millipore      | 07-1545      |
| GCN5L2         | R H-75         | Santa Cruz     | SC-20698     |
| Myc            | M              | Santa Cruz     | SC-40        |
| MYC            | M HRP          | Santa Cruz     | SC-40        |
| Myc            | R              | Santa Cruz     | SC-789       |
| Flag           | M              | Sigma          | F1804        |
| Flag           | Rb             | Sigma          | F7425        |
| c-Myb          | Rb             | Millipore      | 05-175       |
| NFkB P50       | Rb             | Santa Cruz     | SC-7178      |
| NF-kB P50      | M              | Millipore      | 06-886       |
| NF-kB RelA     | M              | Abcom          | ab16502      |
| NF-kB RelA     | Rb             | Millipore      | 12-10060     |
| Ac-H3          | Rb             | Millipore      | 06-599       |
| H3             | Rb             | Millipore      | 04-928       |

**\* All antibodies were used at concentrations as recommended by the manufactures.**
